# Supplementary material for: Radiation-induced abscopal effect and its enhancement by programmed cell death 1 blockade in the hepatocellular carcinoma: A murine model study
Source: PubMed Central journal article supplement — Clin Mol Hepatol. 2020 Dec 7;27(1):144–56. doi: 10.3350/cmh.2020.0095 (PMC7820196; doi:10.3350/cmh.2020.0095), 2020-12-07
Supplement: cmh-2020-0095-suppl1.pdf [file cmh-2020-0095-suppl1.pdf]

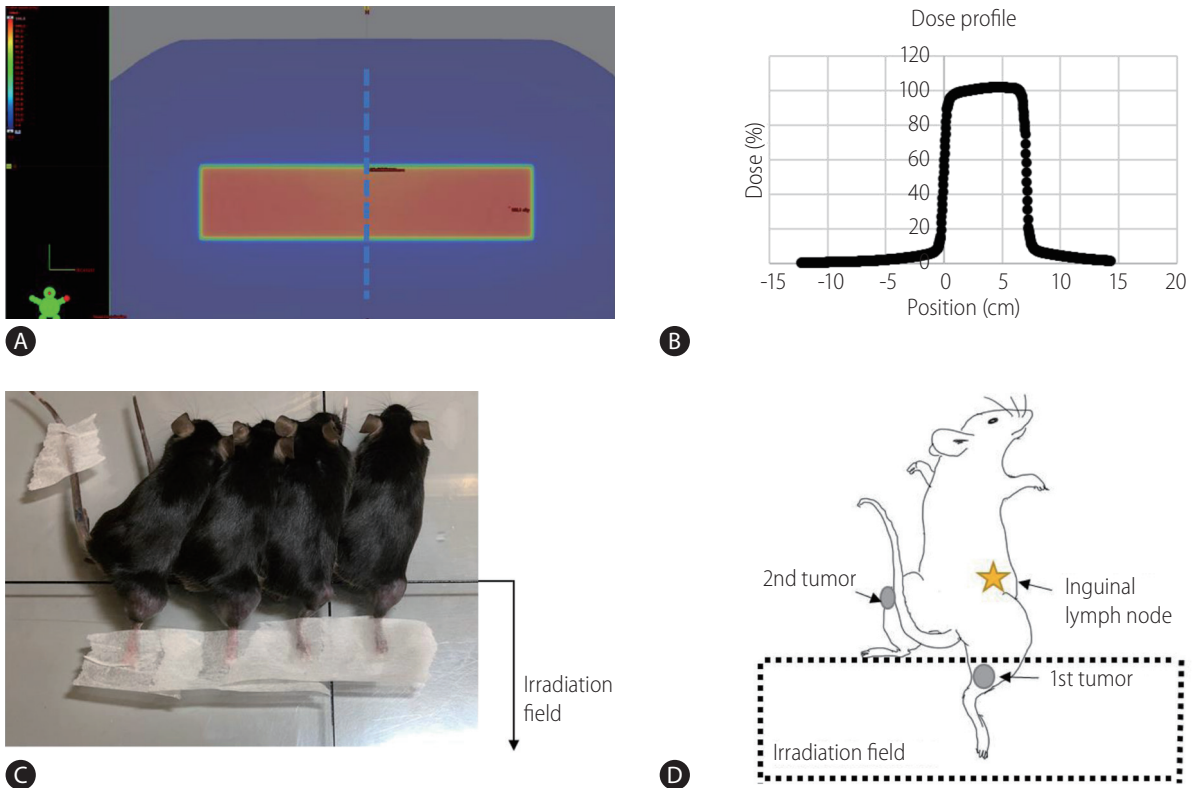

**Supplementary Figure 1.** Setup for irradiation of Hepa 1–6 tumors implanted in C57BL/6 mice. (A) A treatment plan for making 30x7 cm field size. (B) Cross-sectional dose distribution. (C) Photo image showing that tumor-bearing right hind legs were located within the irradiation field. (D) Schematic diagram illustrating position of two tumors and a tumor-draining inguinal lymph node. A primary tumor implanted into a right leg was exposed to X-ray irradiation, but the left leg harboring secondary tumor and the inguinal lymph node were not included in the radiation field.
