# Supplementary material for: Radiation-induced abscopal effect and its enhancement by programmed cell death 1 blockade in the hepatocellular carcinoma: A murine model study
Source: PubMed Central journal article supplement — Clin Mol Hepatol. 2020 Dec 7;27(1):144–56. doi: 10.3350/cmh.2020.0095 (PMC7820196; doi:10.3350/cmh.2020.0095), 2020-12-07
Supplement: cmh-2020-0095-suppl2.pdf [file cmh-2020-0095-suppl2.pdf]

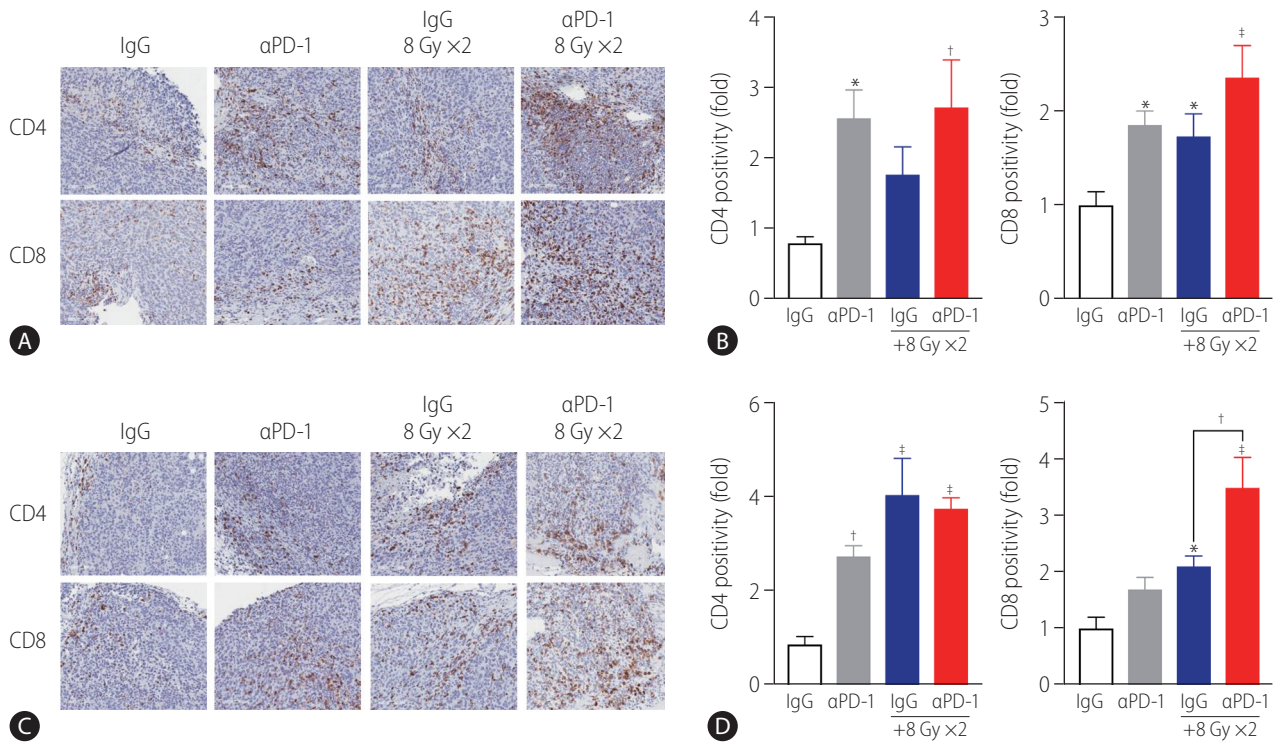

**Supplementary Figure 2.** Both radiation and anti-PD-1 increase T cell infiltration in both primary and abscopal Hepa 1–6 tumors. Representative images of IHC for CD4 and CD8 in the irradiated tumors (A) and non-irradiated tumors (C). Tumors were harvested on day 31 after tumor injection. Formalin-fixed, paraffin-embedded tumor tissues were analyzed for IHC as described in MATERIALS AND METHODS. Quantification data for CD4 and CD8 immunostaining in the irradiated tumors (B) and non-irradiated tumors (D). IgG, immunoglobulin G; PD-1, programmed cell death 1; IHC, immunohistochemistry. \* $P < 0.05$ . † $P < 0.01$ . ‡ $P < 0.001$ .
